# Supplementary material for: Spatial-Temporal Variations of Human Impact on Forest Ecological Functions in the Yellow River Basin from 2004 to 2018
Source: Preprints.org preprint supplement (doi:10.20944/preprints202404.0349.v1), 2024-04-04
Supplement: Supplementary file 1 [file supplementary]

- County-level forest ecological function in the Yellow River basin is moderately low.
- The positive spatial auto-correlation of forest ecological function is increasing.
- Impact of human activities on forest ecological function is predominantly negative.
- Dominant human activity indicators vary across regions due to developmental stages.
